# Supplementary material
Source: Springer Nature journal article supplement (https://www.springermedizin.de/resource/supplementary/12893_2013_444_MOESM3_ESM.pdf/9512154)

Others 33  
patients  
-19%

C.A.F 44  
patients  
-25.3%

C.M.F 11  
patients  
-6.4%

A.C 86 patients  
-49.3%

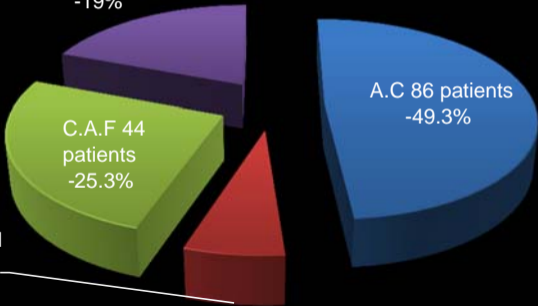

Supplement: MOESM3 [file 9512154]
